# Supplementary material
Source: Springer Nature journal article supplement (https://www.springermedizin.de/resource/supplementary/12936_2013_3336_MOESM2_ESM.pdf/9545664)
Supplement: MOESM2 [file 9545664]

**Additional File 2:****Data***Country level EIR:*

Data on the proportion of children aged 2-10 with *Plasmodium falciparum* parasites (PfPR2-10) in 2007 was published at a 5km grid scale by Hay et al in 2009 [1]. Subsequent work developed a methodology for summarising this data at the country level by weighting it by the population at the 5km grid scale [2]. For the purposes of this analysis we required an estimate of the country-level entomological inoculation rate (EIR), per year. To do this, the parasite rate (PfPR2-10) was first transformed to EIR using a previously published estimate of the non-linear relationship between these parameters [3], as illustrated in **Figure S1, below**. Once the conversion of PfPR2-10 to EIR had been made at the 5km scale it was converted to the country-level EIR using the population weighting methodology previously described by Gething et al [3].

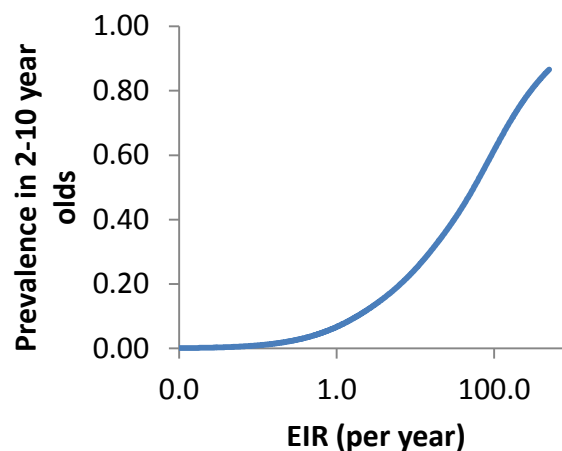

**Figure S1:** The non-linear relationship between EIR and prevalence of *Plasmodium falciparum* parasites in 2–10 year olds derived by fitting a transmission model to a range of data [3]. (Note: In Figure 1 of Griffin et al (2010) a similar relationship is shown between EIR and prevalence in under 15 year olds, which is estimated by fitting the model to a number of datasets giving prevalence in different age groups. This plot is the resulting relationship between EIR and prevalence in 2-10 year olds, for the same parameter values).

## References

1. Hay SI, Guerra CA, Gething PW, Patil AP, Tatem AJ, Noor AM, Kabaria CW, Manh BH, Elyazar IR, Brooker S, , Smith DL, Moyeed RA, Snow RW: **A world malaria map: Plasmodium falciparum endemicity in 2007.** *PLoS Med* 2009, **6**:e1000048.
2. Gething PW, Patil AP, Hay SI: **Quantifying aggregated uncertainty in Plasmodium falciparum malaria prevalence and populations at risk via efficient space-time geostatistical joint simulation.** *PLoS Comp Biol* 2010, **6**:e1000724.
3. Griffin JT, Hollingsworth TD, Okell LC, Churcher TS, White M, Hinsley W, Bousema T, Drakeley CJ, Ferguson NM, Basanez MG, Ghani AC: **Reducing Plasmodium falciparum malaria transmission in Africa: a model-based evaluation of intervention strategies.** *PLoS Med* 2010, **7**: e1000324.
